# Supplementary material for: Host Plant Use by Competing Acacia-Ants: Mutualists Monopolize While Parasites Share Hosts
Source: PubMed Central journal article supplement (PMC3360759; doi:10.1371/journal.pone.0037691), 2012-05-25
Supplement: pone.0037691.s001.pdf [file pone.0037691.s001.pdf]

Figure S1

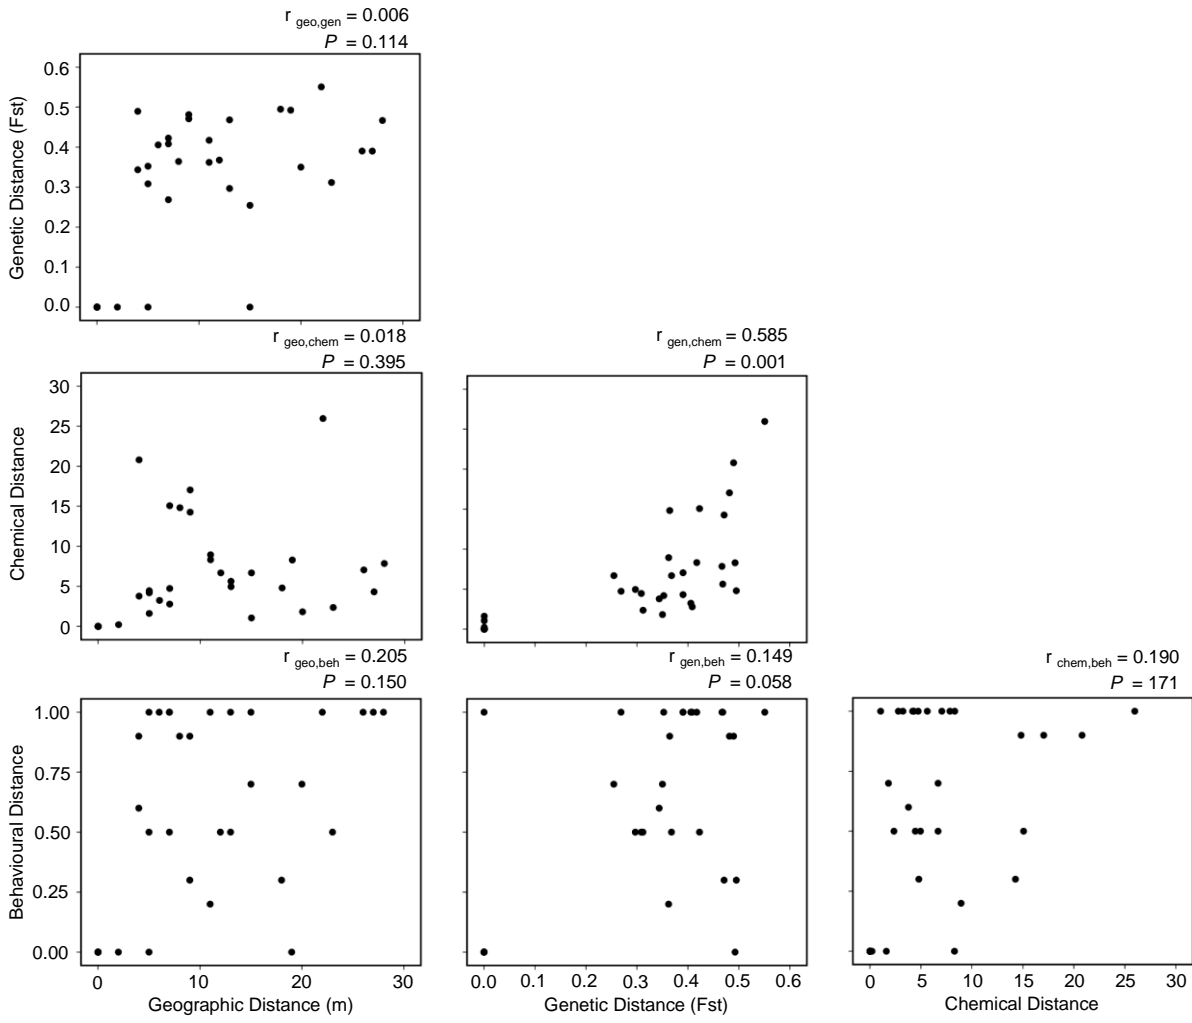

I. Plot MUTUALIST1

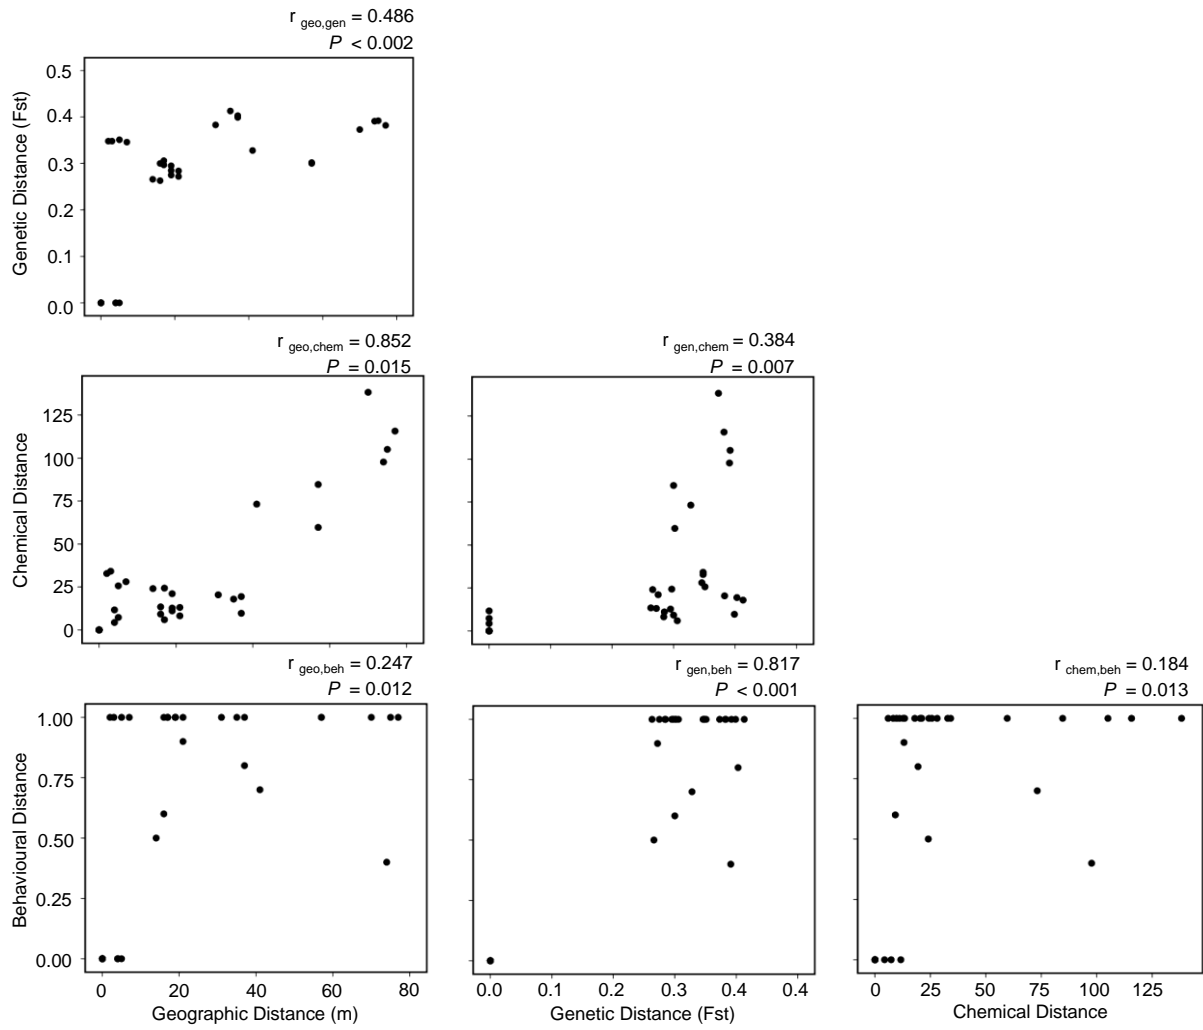

## II. Plot MUTUALIST2

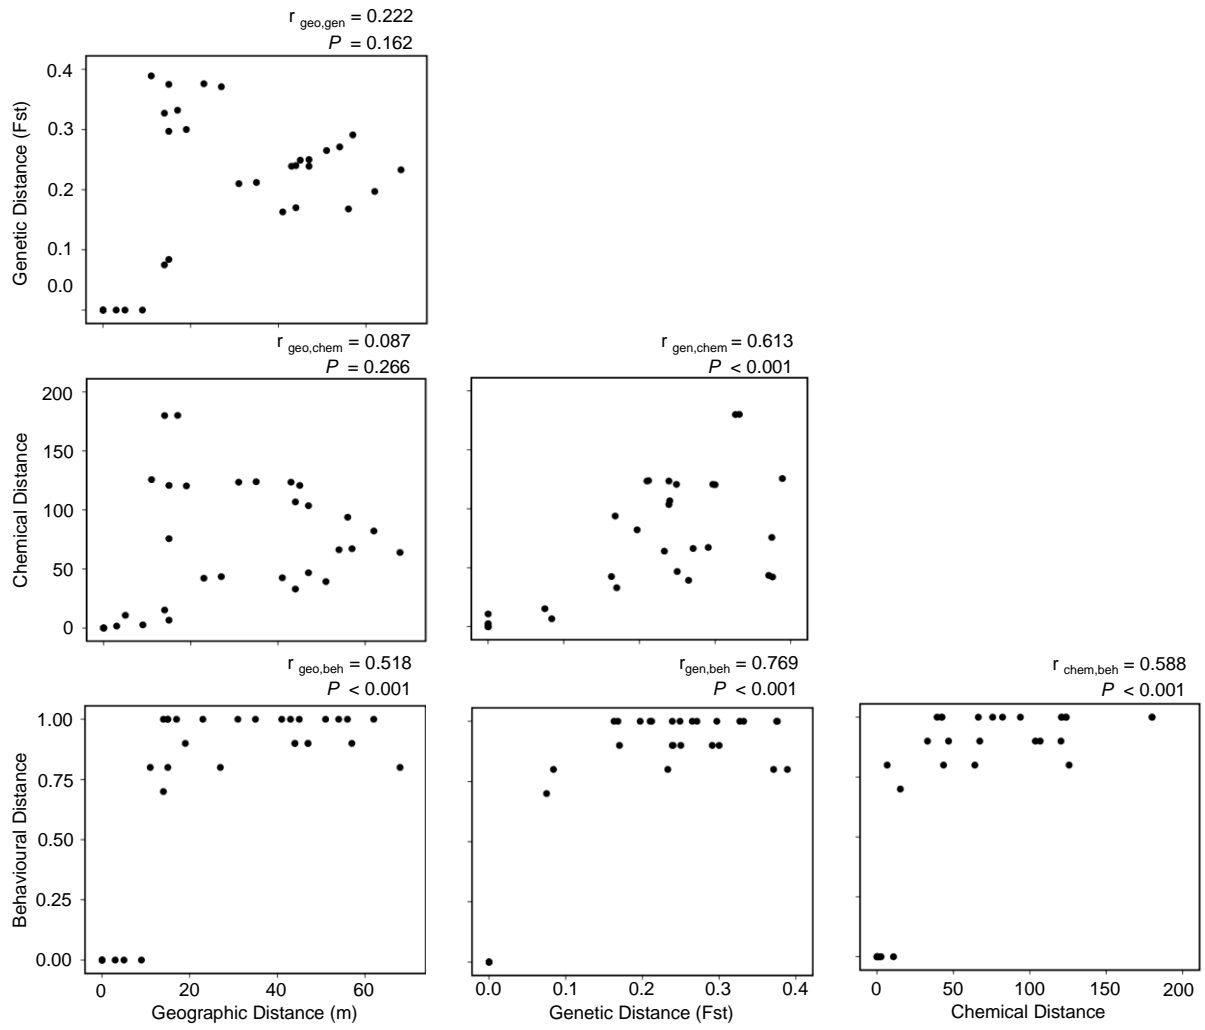

### III. Plot PARASITE1

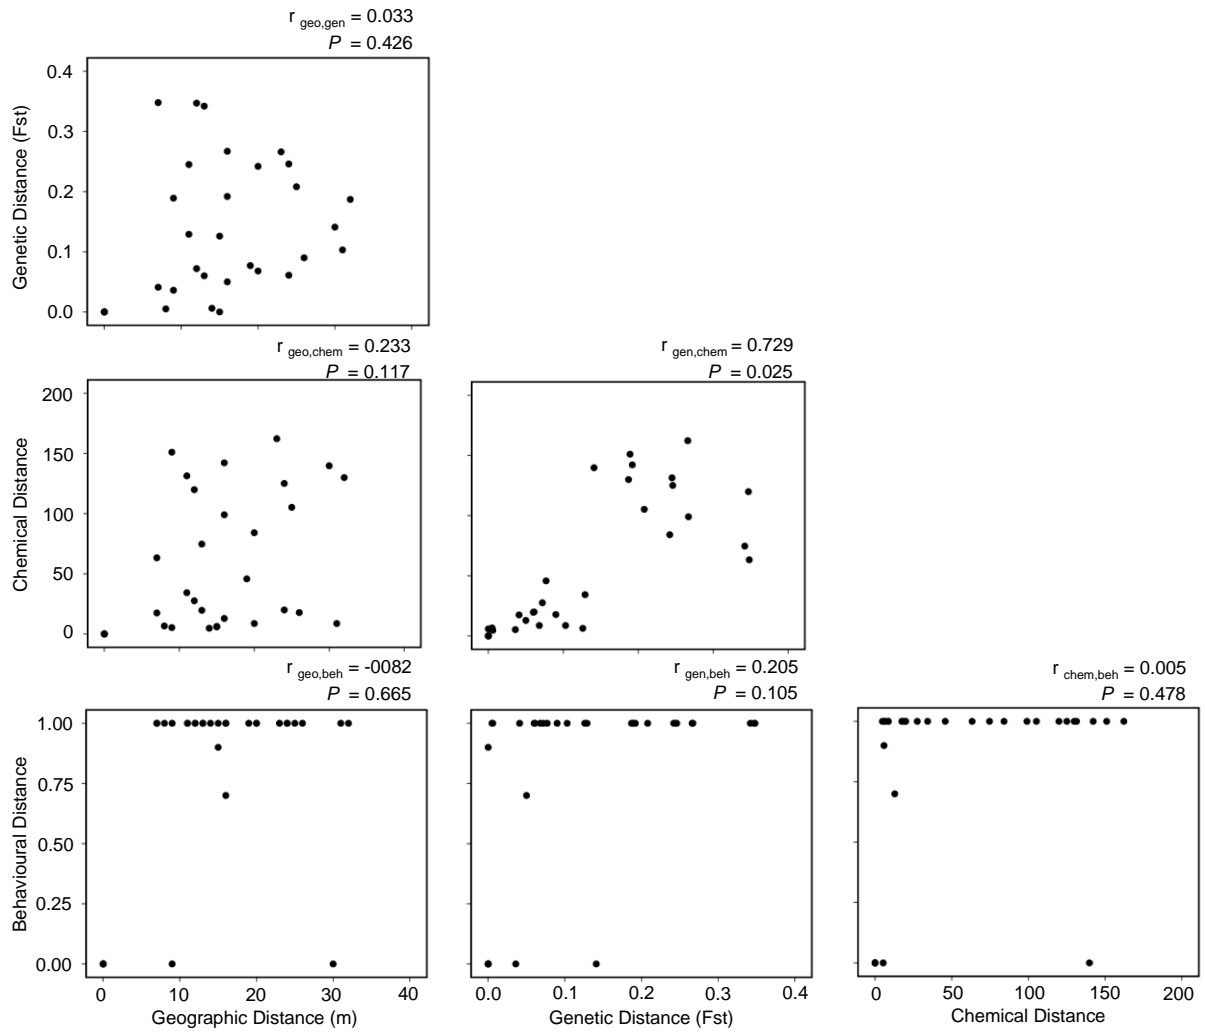

#### IV. Plot PARASITE2
