# Supplementary material for: Host Plant Use by Competing Acacia-Ants: Mutualists Monopolize While Parasites Share Hosts
Source: PubMed Central journal article supplement (PMC3360759; doi:10.1371/journal.pone.0037691), 2012-05-25
Supplement: pone.0037691.s002.pdf [file pone.0037691.s002.pdf]

Table S1

| Acacia     | GPS N     | GPS W      | Elevation (ft) |
|------------|-----------|------------|----------------|
| MUTUALIST1 |           |            |                |
| 1a         | 15°55.601 | 97°09.083  | 49             |
| 1b         | 15°55.607 | 97°09.082  | 39             |
| 1c         | 15°55.601 | 97°09.088  | 44             |
| 1d         | 15°55.595 | 97°09.091  | 43             |
| 1e         | 15°55.597 | 97°09.093  | 55             |
| 1f         | 15°55.598 | 97°09.091  | 55             |
| 1g         | 15°55.599 | 97°09.090  | 50             |
| 1h         | 15°55.598 | 97°09.095  | 48             |
| MUTUALIST2 |           |            |                |
| 2a         | 17°06.010 | 94°55.835  | 474            |
| 2b         | 17°06.022 | 94°55.855  | 438            |
| 2c         | 17°06.022 | 94°55.865  | 430            |
| 2d         | 17°06.021 | 94°55.876  | 403            |
| 2e         | 17°06.024 | 94°55.864  | 447            |
| 2f         | 17°06.024 | 94°55.876  | 416            |
| 2g         | 17°06.021 | 94°55.873  | 447            |
| 2h         | 17°06.022 | 94°55.875  | 429            |
| PARASITE1  |           |            |                |
| 1a         | 17°06.013 | 094°55.855 | 440            |
| 1b         | 17°06.017 | 094°55.850 | 462            |
| 1c         | 17°06.020 | 094°55.850 | 473            |
| 1d         | 17°06.016 | 094°55.842 | 477            |
| 1e         | 17°06.016 | 094°55.840 | 465            |
| 1f         | 17°06.034 | 094°55.823 | 496            |
| 1g         | 17°06.038 | 094°55.831 | 491            |
| 1h         | 17°06.033 | 094°55.831 | 506            |
| PARASITE2  |           |            |                |
| 2a         | 17°06.038 | 94°55.828  | 464            |
| 2b         | 17°06.041 | 94°55.825  | 467            |
| 2c         | 17°06.047 | 94°55.827  | 460            |
| 2d         | 17°06.045 | 94°55.831  | 459            |
| 2e         | 17°06.041 | 94°55.834  | 460            |
| 2f         | 17°06.037 | 94°55.842  | 457            |
| 2g         | 17°06.034 | 94°55.838  | 461            |
| 2h         | 17°06.034 | 94°55.831  | 465            |
