# Supplementary material for: Host Plant Use by Competing Acacia-Ants: Mutualists Monopolize While Parasites Share Hosts
Source: PubMed Central journal article supplement (PMC3360759; doi:10.1371/journal.pone.0037691), 2012-05-25
Supplement: pone.0037691.s003.pdf [file pone.0037691.s003.pdf]

**Table S2**

| Peak number | Retention time [min] | Full compound name           | Short compound name | MUT | PAR |
|-------------|----------------------|------------------------------|---------------------|-----|-----|
| 1           | 15.15                | 4-methylhexacosane           | 4meC26              |     | x   |
| 2           | 15.29                | $\Delta$ x-heptacosene       | C27:1               |     | x   |
| 3           | 15.63                | heptacosane                  | C27                 | x   | x   |
| 4           | 16.06                | 13-methylheptacosane         | 13meC27             |     | x   |
| 5           | 16.41                | 11,15-dimethylheptacosane    | 11,15dimeC27        |     | x   |
| 6           | 16.62                | 3-methylheptacosane          | 3meC27              |     | x   |
| 7           | 16.98                | octacosane                   | C28                 |     | x   |
| 8           | 17.30                | 14-methyloctacosane          | 14meC28             |     | x   |
|             |                      | 13-methyloctacosane          | 13meC28             |     | x   |
|             |                      | 12-methyloctacosane          | 12meC28             |     | x   |
| 9           | 17.77                | 4-methyloctacosane           | 4meC28              | x   | x   |
|             |                      | 3-methyloctacosane           | 3meC28              | x   | x   |
| 10          | 18.07                | $\Delta$ x-nonacosene        | C29:1               | x   |     |
| 11          | 18.27                | nonacosane                   | C29                 | x   | x   |
| 12          | 18.65                | 15-methylnonacosane          | 15 meC29            |     | x   |
|             |                      | 13-methylnonacosane          | 13 meC29            |     | x   |
|             |                      | 11-methylnonacosane          | 11meC29             |     | x   |
| 13          | 19.03                | 11,15-dimethylnonacosane     | 11,15dimeC29        |     | x   |
|             |                      | 13,15-dimethylnonacosane     | 13,15dimeC29        |     | x   |
|             |                      | 5-methylnonacosane           | 5meC29              |     | x   |
| 14          | 19.21                | 3-methylnonacosane           | 3meC29              | x   | x   |
| 15          | 19.55                | 3, x-dimethylnonacosane      | 3,xdimeC29          |     | x   |
|             |                      | triacontane                  | C30                 | x   | x   |
| 16          | 19.85                | 14-methyltriacontane         | 14meC30             |     | x   |
|             |                      | 12-methyltriacontane         | 12meC30             |     | x   |
| 17          | 20.32                | 4-methyltriacontane          | 4meC30              | x   | x   |
| 18          | 20.45                | 3-methyltriacontane          | 3meC30              | x   | x   |
| 19          | 20.58                | $\Delta$ x-hentriacontene    | C31:1               |     | x   |
| 20          | 20.81                | hentriacontane               | C31                 | x   |     |
| 21          | 21.14                | 15-methylhentriacontane      | 15meC31             |     | x   |
|             |                      | 13-methylhentriacontane      | 13meC31             |     | x   |
|             |                      | 11-methylhentriacontane      | 11meC31             |     | x   |
| 22          | 21.44                | 11,15-dimethylhentriacontane | 11,15dimeC31        |     | x   |
| 23          | 21.67                | 3-methylhentriacontane       | 3meC31              | x   | x   |
| 24          | 23.00                | x, y-dimethyldotriacontane   | x, y-dimeC32        | x   |     |

|    |       |                                |              |   |   |
|----|-------|--------------------------------|--------------|---|---|
| 25 | 23.22 | 14-methyltriacontane           | 14meC32      |   | x |
|    |       | 12-methyltriacontane           | 12meC32      |   | x |
| 26 | 23.50 | 15-methyltriacontane           | 15meC33      | x |   |
|    |       | 13-methyltriacontane           | 13meC33      | x | x |
|    |       | 11-methyltriacontane           | 11meC33      | x | x |
| 27 | 23.79 | 11,15-dimethyltriacontane      | 11,15dimeC33 | x | x |
|    |       | 11,12-dimethyltriacontane      | 11,12dimeC33 | x |   |
| 28 | 24.08 | unidentified compound          | unID         | x |   |
| 29 | 25.71 | 17-methylpentatriacontane      | 17meC35      | x | x |
|    |       | 15-methylpentatriacontane      | 15meC35      | x | x |
|    |       | 13-methylpentatriacontane      | 13meC35      | x | x |
|    |       | 11-methylpentatriacontane      | 11meC35      | x | x |
| 30 | 26.03 | 11,15-dimethylpentatriacontane | 11,15dimeC35 | x | x |
| 31 | 26.33 | unidentified compound          | unID         | x |   |
| 32 | 28.15 | 11,x-dimethylheptatriacontane  | 11,xdimeC37  | x |   |
