# Supplementary material for: Host Plant Use by Competing Acacia-Ants: Mutualists Monopolize While Parasites Share Hosts
Source: PubMed Central journal article supplement (PMC3360759; doi:10.1371/journal.pone.0037691), 2012-05-25
Supplement: pone.0037691.s004.pdf [file pone.0037691.s004.pdf]

**Table S3**

I. Colony differentiation based on genetic, chemical, behavioral and geographic pairwise distances in plot MUTUALIST1.

a) Pairwise genetic distances ( $F_{ST}$ ) of *P. ferrugineus* in plot MUTUALIST1 using sampled workers derived from one acacia as grouping variable. Results are based on twelve microsatellite loci (Table 2). Bold numbers indicate significance after multiple comparisons,  $P < 0.05$ .

|    |              |              |              |              |              |              |              |    |
|----|--------------|--------------|--------------|--------------|--------------|--------------|--------------|----|
| 1a | —            |              |              |              |              |              |              |    |
| 1b | <b>0.417</b> | —            |              |              |              |              |              |    |
| 1c | <b>0.364</b> | 0.000        | —            |              |              |              |              |    |
| 1d | <b>0.495</b> | <b>0.390</b> | <b>0.368</b> | —            |              |              |              |    |
| 1e | <b>0.493</b> | <b>0.390</b> | <b>0.362</b> | 0.000        | —            |              |              |    |
| 1f | <b>0.255</b> | <b>0.312</b> | <b>0.269</b> | <b>0.352</b> | <b>0.344</b> | —            |              |    |
| 1g | <b>0.297</b> | <b>0.350</b> | <b>0.308</b> | <b>0.408</b> | <b>0.406</b> | 0.000        | —            |    |
| 1h | <b>0.551</b> | <b>0.467</b> | <b>0.468</b> | <b>0.481</b> | <b>0.490</b> | <b>0.423</b> | <b>0.471</b> | —  |
|    | 1a           | 1b           | 1c           | 1d           | 1e           | 1f           | 1g           | 1h |

b) Pairwise chemical (Mahalanobis) distances based on discriminant analysis of the cuticular hydrocarbon profiles of *P. ferrugineus* in plot MUTUALIST1. Workers derived from one acacia were used as grouping variable (Fig. 4). Bold numbers indicate significance.

|    |              |             |             |              |              |              |              |    |
|----|--------------|-------------|-------------|--------------|--------------|--------------|--------------|----|
| 1a | —            |             |             |              |              |              |              |    |
| 1b | <b>8.32</b>  | —           |             |              |              |              |              |    |
| 1c | <b>14.82</b> | 1.05        | —           |              |              |              |              |    |
| 1d | <b>4.80</b>  | <b>4.31</b> | <b>6.68</b> | —            |              |              |              |    |
| 1e | <b>8.29</b>  | <b>7.05</b> | <b>8.94</b> | 1.62         | —            |              |              |    |
| 1f | <b>6.69</b>  | <b>2.36</b> | <b>4.73</b> | <b>4.19</b>  | <b>3.78</b>  | —            |              |    |
| 1g | <b>4.96</b>  | 1.82        | <b>4.46</b> | 2.79         | <b>3.24</b>  | 0.21         | —            |    |
| 1h | <b>25.97</b> | <b>7.85</b> | <b>5.63</b> | <b>17.04</b> | <b>20.80</b> | <b>15.07</b> | <b>14.27</b> | —  |
|    | 1a           | 1b          | 1c          | 1d           | 1e           | 1f           | 1g           | 1h |

c) Pairwise behavioral distance (proportions of aggressive encounters) of *P. ferrugineus* in plot MUTUALIST1. Workers derived from one acacia were used as grouping variable (Fig. 2).

|    |     |     |     |     |     |     |     |    |
|----|-----|-----|-----|-----|-----|-----|-----|----|
| 1a | —   |     |     |     |     |     |     |    |
| 1b | 1.0 | —   |     |     |     |     |     |    |
| 1c | 0.9 | 1.0 | —   |     |     |     |     |    |
| 1d | 0.3 | 1.0 | 0.5 | —   |     |     |     |    |
| 1e | 0.0 | 1.0 | 0.2 | 0.0 | —   |     |     |    |
| 1f | 0.7 | 0.5 | 1.0 | 1.0 | 0.6 | —   |     |    |
| 1g | 0.5 | 0.7 | 0.5 | 1.0 | 1.0 | 0.0 | —   |    |
| 1h | 1.0 | 1.0 | 1.0 | 0.9 | 0.9 | 0.5 | 0.3 | —  |
|    | 1a  | 1b  | 1c  | 1d  | 1e  | 1f  | 1g  | 1h |

d) Pairwise geographic distances (in m) between the study acacias of *P. ferrugineus* in plot MUTUALIST1 (Fig. 1).

|    |    |    |    |    |    |    |    |    |
|----|----|----|----|----|----|----|----|----|
| 1a | —  |    |    |    |    |    |    |    |
| 1b | 11 | —  |    |    |    |    |    |    |
| 1c | 8  | 15 | —  |    |    |    |    |    |
| 1d | 18 | 27 | 12 | —  |    |    |    |    |
| 1e | 19 | 26 | 11 | 5  | —  |    |    |    |
| 1f | 15 | 23 | 7  | 5  | 4  | —  |    |    |
| 1g | 13 | 20 | 5  | 7  | 6  | 2  | —  |    |
| 1h | 22 | 28 | 13 | 9  | 4  | 7  | 9  | —  |
|    | 1a | 1b | 1c | 1d | 1e | 1f | 1g | 1h |

II. Colony differentiation based on genetic, chemical, behavioral and geographic pairwise distances in plot MUTUALIST2.

a) Pairwise genetic distances ( $F_{ST}$ ) of *P. ferrugineus* in plot MUTUALIST2 using sampled workers derived from one acacia as grouping variable. Results are based on twelve microsatellite loci (Table 2). Bold numbers indicate significance after multiple comparisons,  $P < 0.05$ .

|    |              |              |              |              |              |              |              |    |
|----|--------------|--------------|--------------|--------------|--------------|--------------|--------------|----|
| 2a | —            |              |              |              |              |              |              |    |
| 2b | <b>0.328</b> | —            |              |              |              |              |              |    |
| 2c | <b>0.302</b> | <b>0.306</b> | —            |              |              |              |              |    |
| 2d | <b>0.392</b> | <b>0.399</b> | <b>0.285</b> | —            |              |              |              |    |
| 2e | <b>0.300</b> | <b>0.300</b> | 0.000        | <b>0.284</b> | —            |              |              |    |
| 2f | <b>0.382</b> | <b>0.403</b> | <b>0.275</b> | <b>0.351</b> | <b>0.272</b> | —            |              |    |
| 2g | <b>0.373</b> | <b>0.383</b> | <b>0.266</b> | 0.000        | <b>0.263</b> | <b>0.346</b> | —            |    |
| 2h | <b>0.391</b> | <b>0.413</b> | <b>0.297</b> | <b>0.348</b> | <b>0.295</b> | 0.000        | <b>0.348</b> | —  |
|    | 2a           | 2b           | 2c           | 2d           | 2e           | 2f           | 2g           | 2h |

b) Pairwise chemical (Mahalanobis) distances based on discriminant analysis of the cuticular hydrocarbon profiles of *P. ferrugineus* in plot MUTUALIST2. Workers derived from one acacia were used as grouping variable (Fig. 4). Bold numbers indicate significance.

|    |               |              |              |              |              |              |              |    |
|----|---------------|--------------|--------------|--------------|--------------|--------------|--------------|----|
| 2a | —             |              |              |              |              |              |              |    |
| 2b | <b>73.17</b>  | —            |              |              |              |              |              |    |
| 2c | <b>59.64</b>  | <b>5.94</b>  | —            |              |              |              |              |    |
| 2d | <b>105.04</b> | <b>9.67</b>  | <b>11.06</b> | —            |              |              |              |    |
| 2e | <b>84.63</b>  | <b>9.17</b>  | <b>11.65</b> | <b>8.19</b>  | —            |              |              |    |
| 2f | <b>115.69</b> | <b>19.43</b> | <b>21.05</b> | <b>25.65</b> | <b>13.07</b> | —            |              |    |
| 2g | <b>138.23</b> | <b>20.40</b> | <b>24.03</b> | <b>7.29</b>  | <b>13.38</b> | <b>28.04</b> | —            |    |
| 2h | <b>97.68</b>  | <b>17.93</b> | <b>24.32</b> | <b>32.79</b> | <b>12.71</b> | <b>4.33</b>  | <b>34.12</b> | —  |
|    | 2a            | 2b           | 2c           | 2d           | 2e           | 2f           | 2g           | 2h |

c) Pairwise behavioral distance (proportions of aggressive encounters) of *P. ferrugineus* in plot MUTUALIST2. Workers derived from one acacia were used as grouping variable (Fig. 2).

|    |      |      |      |      |      |      |      |    |
|----|------|------|------|------|------|------|------|----|
| 2a | —    |      |      |      |      |      |      |    |
| 2b | 0.70 | —    |      |      |      |      |      |    |
| 2c | 1.00 | 1.00 | —    |      |      |      |      |    |
| 2d | 1.00 | 1.00 | 1.00 | —    |      |      |      |    |
| 2e | 1.00 | 0.60 | 0.00 | 1.00 | —    |      |      |    |
| 2f | 1.00 | 0.80 | 1.00 | 1.00 | 0.90 | —    |      |    |
| 2g | 1.00 | 1.00 | 0.50 | 0.00 | 1.00 | 1.00 | —    |    |
| 2h | 0.40 | 1.00 | 1.00 | 1.00 | 1.00 | 0.00 | 1.00 | —  |
|    | 2a   | 2b   | 2c   | 2d   | 2e   | 2f   | 2g   | 2h |

d) Pairwise geographic distances (in m) between the study acacias of *P. ferrugineus* in plot MUTUALIST2 (Fig. 1).

|    |    |    |    |    |    |    |    |    |
|----|----|----|----|----|----|----|----|----|
| 2a | —  |    |    |    |    |    |    |    |
| 2b | 41 | —  |    |    |    |    |    |    |
| 2c | 57 | 17 | —  |    |    |    |    |    |
| 2d | 75 | 37 | 19 | —  |    |    |    |    |
| 2e | 57 | 16 | 4  | 21 | —  |    |    |    |
| 2f | 77 | 37 | 19 | 5  | 21 | —  |    |    |
| 2g | 70 | 31 | 14 | 5  | 16 | 7  | —  |    |
| 2h | 74 | 35 | 17 | 2  | 19 | 4  | 3  | —  |
|    | 2a | 2b | 2c | 2d | 2e | 2f | 2g | 2h |

III. Colony differentiation based on genetic, chemical, behavioral and geographic pairwise distances in plot PARASITE1.

a) Pairwise genetic distances ( $F_{ST}$ ) of *P. gracilis* in plot PARASITE1 using sampled workers derived from one acacia as grouping variable. Results are based on nine microsatellite loci (Table 3). Bold numbers indicate significance after multiple comparisons,  $P < 0.05$ .

|    |              |              |              |              |              |              |       |    |
|----|--------------|--------------|--------------|--------------|--------------|--------------|-------|----|
| 1a | —            |              |              |              |              |              |       |    |
| 1b | <b>0.389</b> | —            |              |              |              |              |       |    |
| 1c | <b>0.375</b> | 0.000        | —            |              |              |              |       |    |
| 1d | <b>0.376</b> | <b>0.327</b> | <b>0.297</b> | —            |              |              |       |    |
| 1e | <b>0.371</b> | <b>0.332</b> | <b>0.300</b> | 0.000        | —            |              |       |    |
| 1f | <b>0.233</b> | <b>0.291</b> | <b>0.271</b> | <b>0.239</b> | <b>0.240</b> | —            |       |    |
| 1g | <b>0.197</b> | <b>0.265</b> | <b>0.250</b> | <b>0.249</b> | <b>0.239</b> | <b>0.084</b> | —     |    |
| 1h | <b>0.168</b> | <b>0.170</b> | <b>0.163</b> | <b>0.210</b> | <b>0.212</b> | <b>0.075</b> | 0.000 | —  |
|    | 1a           | 1b           | 1c           | 1d           | 1e           | 1f           | 1g    | 1h |

b) Pairwise chemical (Mahalanobis) distances based on discriminant analysis of the cuticular hydrocarbon profiles of *P. gracilis* in plot PARASITE1. Workers derived from one acacia were used as grouping variable (Fig. 4). Bold numbers indicate significance.

|    |               |               |               |               |               |              |             |    |
|----|---------------|---------------|---------------|---------------|---------------|--------------|-------------|----|
| 1a | —             |               |               |               |               |              |             |    |
| 1b | <b>125.65</b> | —             |               |               |               |              |             |    |
| 1c | <b>75.66</b>  | <b>10.72</b>  | —             |               |               |              |             |    |
| 1d | <b>42.14</b>  | <b>179.93</b> | <b>120.71</b> | —             |               |              |             |    |
| 1e | <b>43.50</b>  | <b>180.06</b> | <b>120.35</b> | 1.66          | —             |              |             |    |
| 1f | <b>64.01</b>  | <b>67.18</b>  | <b>66.29</b>  | <b>103.59</b> | <b>106.78</b> | —            |             |    |
| 1g | <b>82.14</b>  | <b>39.29</b>  | <b>46.80</b>  | <b>120.72</b> | <b>123.51</b> | 6.64         | —           |    |
| 1h | <b>93.83</b>  | <b>32.99</b>  | <b>42.52</b>  | <b>123.53</b> | <b>123.87</b> | <b>15.22</b> | <b>2.61</b> | —  |
|    | 1a            | 1b            | 1c            | 1d            | 1e            | 1f           | 1g          | 1h |

c) Pairwise behavioral distance (proportions of aggressive encounters) of *P. gracilis* in plot PARASITE1. Workers derived from one acacia were used as grouping variable (Fig. 2).

|    |     |     |     |     |     |     |     |    |
|----|-----|-----|-----|-----|-----|-----|-----|----|
| 1a | —   |     |     |     |     |     |     |    |
| 1b | 0.8 | —   |     |     |     |     |     |    |
| 1c | 1.0 | 0.0 | —   |     |     |     |     |    |
| 1d | 1.0 | 1.0 | 1.0 | —   |     |     |     |    |
| 1e | 0.8 | 1.0 | 0.9 | 0.0 | —   |     |     |    |
| 1f | 0.8 | 0.9 | 1.0 | 0.9 | 0.9 | —   |     |    |
| 1g | 1.0 | 1.0 | 0.9 | 1.0 | 1.0 | 0.8 | —   |    |
| 1h | 1.0 | 0.9 | 1.0 | 1.0 | 1.0 | 0.7 | 0.0 | —  |
|    | 1a  | 1b  | 1c  | 1d  | 1e  | 1f  | 1g  | 1h |

d) Pairwise geographic distances (in m) between the study acacias of *P. gracilis* in plot PARASITE1 (Fig. 1).

|    |    |    |    |    |    |    |    |    |
|----|----|----|----|----|----|----|----|----|
| 1a | —  |    |    |    |    |    |    |    |
| 1b | 11 | —  |    |    |    |    |    |    |
| 1c | 15 | 5  | —  |    |    |    |    |    |
| 1d | 23 | 14 | 15 | —  |    |    |    |    |
| 1e | 27 | 17 | 19 | 3  | —  |    |    |    |
| 1f | 68 | 57 | 54 | 47 | 44 | —  |    |    |
| 1g | 62 | 51 | 47 | 45 | 43 | 15 | —  |    |
| 1h | 56 | 44 | 41 | 31 | 35 | 14 | 9  | —  |
|    | 1a | 1b | 1c | 1d | 1e | 1f | 1g | 1h |

IV. Colony differentiation based on genetic, chemical, behavioral and geographic pairwise distances in plot PARASITE2.

a) Pairwise genetic distances ( $F_{ST}$ ) of *P. gracilis* in plot PARASITE2 using sampled workers derived from one acacia as grouping variable. Results are based on nine microsatellite loci (Table 3). Bold numbers indicate significance after multiple comparisons,  $P < 0.05$ .

|    |              |              |              |              |              |              |       |    |
|----|--------------|--------------|--------------|--------------|--------------|--------------|-------|----|
| 2a | —            |              |              |              |              |              |       |    |
| 2b | 0.041        | —            |              |              |              |              |       |    |
| 2c | <b>0.267</b> | <b>0.245</b> | —            |              |              |              |       |    |
| 2d | <b>0.342</b> | <b>0.347</b> | <b>0.348</b> | —            |              |              |       |    |
| 2e | <b>0.129</b> | <b>0.126</b> | <b>0.192</b> | <b>0.189</b> | —            |              |       |    |
| 2f | <b>0.061</b> | <b>0.103</b> | <b>0.187</b> | <b>0.246</b> | 0.000        | —            |       |    |
| 2g | <b>0.077</b> | <b>0.090</b> | <b>0.141</b> | <b>0.266</b> | 0.006        | 0.000        | —     |    |
| 2h | 0.036        | 0.050        | <b>0.208</b> | <b>0.242</b> | <b>0.060</b> | <b>0.068</b> | 0.072 | —  |
|    | 2a           | 2b           | 2c           | 2d           | 2e           | 2f           | 2g    | 2h |

b) Pairwise chemical (Mahalanobis) distances based on discriminant analysis of the cuticular hydrocarbon profiles of *P. gracilis* in plot PARASITE2. Workers derived from one acacia were used as grouping variable (Fig. 4). Bold numbers indicate significance.

|    |              |               |               |               |              |             |              |    |
|----|--------------|---------------|---------------|---------------|--------------|-------------|--------------|----|
| 2a | —            |               |               |               |              |             |              |    |
| 2b | <b>17.46</b> | —             |               |               |              |             |              |    |
| 2c | <b>99.04</b> | <b>131.38</b> | —             |               |              |             |              |    |
| 2d | <b>74.64</b> | <b>119.89</b> | <b>63.27</b>  | —             |              |             |              |    |
| 2e | <b>34.27</b> | <b>6.32</b>   | <b>142.19</b> | <b>151.00</b> | —            |             |              |    |
| 2f | <b>19.95</b> | <b>8.63</b>   | <b>129.94</b> | <b>125.07</b> | <b>5.83</b>  | —           |              |    |
| 2g | <b>45.76</b> | <b>17.78</b>  | <b>139.79</b> | <b>162.21</b> | <b>4.75</b>  | <b>6.61</b> | —            |    |
| 2h | <b>5.28</b>  | <b>12.87</b>  | <b>105.23</b> | <b>84.09</b>  | <b>19.60</b> | <b>8.66</b> | <b>27.52</b> | —  |
|    | 2a           | 2b            | 2c            | 2d            | 2e           | 2f          | 2g           | 2h |

c) Pairwise behavioral distance (proportions of aggressive encounters) of *P. gracilis* in plot PARASITE2. Workers derived from one acacia were used as grouping variable (Fig. 2).

|    |     |     |     |     |     |     |     |    |
|----|-----|-----|-----|-----|-----|-----|-----|----|
| 2a | —   |     |     |     |     |     |     |    |
| 2b | 1.0 | —   |     |     |     |     |     |    |
| 2c | 1.0 | 1.0 | —   |     |     |     |     |    |
| 2d | 1.0 | 1.0 | 1.0 | —   |     |     |     |    |
| 2e | 1.0 | 1.0 | 1.0 | 1.0 | —   |     |     |    |
| 2f | 1.0 | 1.0 | 1.0 | 1.0 | 0.9 | —   |     |    |
| 2g | 1.0 | 1.0 | 0.0 | 1.0 | 1.0 | 1.0 | —   |    |
| 2h | 0.0 | 0.7 | 1.0 | 1.0 | 1.0 | 1.0 | 1.0 | —  |
|    | 2a  | 2b  | 2c  | 2d  | 2e  | 2f  | 2g  | 2h |

d) Pairwise geographic distances (in m) between the study acacias of *P. gracilis* in plot PARASITE2 (Fig. 1).

|    |    |    |    |    |    |    |    |    |
|----|----|----|----|----|----|----|----|----|
| 2a | —  |    |    |    |    |    |    |    |
| 2b | 7  | —  |    |    |    |    |    |    |
| 2c | 16 | 11 | —  |    |    |    |    |    |
| 2d | 13 | 12 | 7  | —  |    |    |    |    |
| 2e | 11 | 15 | 16 | 9  | —  |    |    |    |
| 2f | 24 | 31 | 32 | 24 | 15 | —  |    |    |
| 2g | 19 | 26 | 30 | 23 | 14 | 8  | —  |    |
| 2h | 9  | 16 | 25 | 20 | 13 | 20 | 12 | —  |
|    | 2a | 2b | 2c | 2d | 2e | 2f | 2g | 2h |
