# Supplementary material for: Host Plant Use by Competing Acacia-Ants: Mutualists Monopolize While Parasites Share Hosts
Source: PubMed Central journal article supplement (PMC3360759; doi:10.1371/journal.pone.0037691), 2012-05-25
Supplement: pone.0037691.s005.pdf [file pone.0037691.s005.pdf]

**Table S4**

Correct and incorrect posterior assignment of individual workers to their group (using the acacia of which the ant workers were collected as grouping variable) based on cuticular hydrocarbon profiles in each plot.

I) Plot MUUALIST1: Posterior probabilities of each individual worker to be assigned to its original acacia in which it was sampled based on the chemical hydrocarbon profile. Cases, in which posterior probabilities were higher for another acacia (bold), this posterior probability, as well as the identification for the other acacia are given.

| Original acacia | Individual | Posterior probability for |                    |                    |
|-----------------|------------|---------------------------|--------------------|--------------------|
|                 |            | Original acacia           | Alternative acacia | Alternative acacia |
| 1a              | 1a-01      | 0.83                      |                    |                    |
| 1a              | 1a-02      | <b>0.31</b>               | <b>0.34</b>        | <b>1g</b>          |
| 1a              | 1a-03      | <b>0.02</b>               | <b>0.47</b>        | <b>1f</b>          |
| 1a              | 1a-04      | 0.88                      |                    |                    |
| 1a              | 1a-05      | 0.77                      |                    |                    |
| 1a              | 1a-06      | 0.88                      |                    |                    |
| 1a              | 1a-08      | 0.97                      |                    |                    |
| 1a              | 1a-09      | 0.96                      |                    |                    |
| 1a              | 1a-10      | 0.45                      |                    |                    |
| 1b              | 1b-01      | 0.48                      |                    |                    |
| 1b              | 1b-02      | 0.39                      |                    |                    |
| 1b              | 1b-03      | <b>0.26</b>               | <b>0.58</b>        | <b>1c</b>          |
| 1b              | 1b-04      | 0.53                      |                    |                    |
| 1b              | 1b-05      | <b>0.20</b>               | <b>0.31</b>        | <b>1c</b>          |
| 1b              | 1b-06      | 0.56                      |                    |                    |
| 1b              | 1b-07      | 0.30                      |                    |                    |
| 1b              | 1b-08      | <b>0.25</b>               | <b>0.26</b>        | <b>1g</b>          |
| 1b              | 1b-09      | 0.54                      |                    |                    |
| 1b              | 1b-10      | 0.36                      |                    |                    |
| 1c              | 1c-01      | 0.48                      |                    |                    |
| 1c              | 1c-02      | 0.90                      |                    |                    |
| 1c              | 1c-03      | <b>0.20</b>               | <b>0.23</b>        | <b>1b</b>          |
| 1c              | 1c-04      | 0.53                      |                    |                    |
| 1c              | 1c-05      | <b>0.35</b>               | <b>0.41</b>        | <b>1b</b>          |
| 1c              | 1c-07      | 0.51                      |                    |                    |
| 1c              | 1c-08      | 0.30                      |                    |                    |
| 1c              | 1c-09      | <b>0.12</b>               | <b>0.43</b>        | <b>1b</b>          |

|    |       |             |             |           |
|----|-------|-------------|-------------|-----------|
| 1c | 1c-10 | <b>0.18</b> | <b>0.40</b> | <b>1f</b> |
| 1d | 1d-01 | 0.48        |             |           |
| 1d | 1d-03 | <b>0.15</b> | <b>0.28</b> | <b>1g</b> |
| 1d | 1d-04 | 0.24        |             |           |
| 1d | 1d-08 | 0.42        |             |           |
| 1d | 1d-09 | 0.50        |             |           |
| 1d | 1d-10 | <b>0.14</b> | <b>0.32</b> | <b>1g</b> |
| 1e | 1e-01 | 0.85        |             |           |
| 1e | 1e-02 | 0.47        |             |           |
| 1e | 1e-03 | 0.56        |             |           |
| 1e | 1e-04 | 0.56        |             |           |
| 1e | 1e-05 | 0.30        |             |           |
| 1e | 1e-06 | 0.82        |             |           |
| 1e | 1e-07 | 0.75        |             |           |
| 1e | 1e-08 | <b>0.26</b> | <b>0.30</b> | <b>1c</b> |
| 1e | 1e-09 | <b>0.03</b> | <b>0.30</b> | <b>1g</b> |
| 1e | 1e-10 | 0.75        |             |           |
| 1f | 1f-01 | 0.49        |             |           |
| 1f | 1f-02 | 0.49        |             |           |
| 1f | 1f-03 | 0.39        |             |           |
| 1f | 1f-04 | <b>0.04</b> | <b>0.44</b> | <b>1d</b> |
| 1f | 1f-05 | 0.44        |             |           |
| 1f | 1f-06 | 0.39        |             |           |
| 1f | 1f-08 | <b>0.30</b> | <b>0.33</b> | <b>1g</b> |
| 1f | 1f-09 | <b>0.24</b> | <b>0.25</b> | <b>1e</b> |
| 1f | 1f-10 | 0.37        |             |           |
| 1g | 1g-01 | <b>0.05</b> | <b>0.91</b> | <b>1a</b> |
| 1g | 1g-02 | 0.40        |             |           |
| 1g | 1g-03 | 0.34        |             |           |
| 1g | 1g-04 | <b>0.33</b> | <b>0.55</b> | <b>1f</b> |
| 1g | 1g-05 | <b>0.23</b> | <b>0.26</b> | <b>1e</b> |
| 1g | 1g-07 | <b>0.19</b> | <b>0.42</b> | <b>1e</b> |
| 1g | 1g-08 | <b>0.13</b> | <b>0.49</b> | <b>1e</b> |
| 1g | 1g-09 | <b>0.26</b> | <b>0.42</b> | <b>1a</b> |
| 1g | 1g-10 | 0.31        |             |           |
| 1h | 1h-02 | 0.72        |             |           |
| 1h | 1h-03 | <b>0.01</b> | <b>0.35</b> | <b>1b</b> |
| 1h | 1h-04 | 1.00        |             |           |

---

|    |       |             |             |           |
|----|-------|-------------|-------------|-----------|
| 1h | 1h-07 | <b>0.23</b> | <b>0.41</b> | <b>1b</b> |
| 1h | 1h-08 | <b>0.01</b> | <b>0.31</b> | <b>1b</b> |
| 1h | 1h-09 | 1.00        |             |           |

---

II) Plot MUTUALIST2: Posterior probabilities of each individual worker to be assigned to its original acacia in which it was sampled based on the chemical hydrocarbon profile. Cases, in which posterior probabilities were higher for another acacia (bold), this posterior probability, as well as the identification for the other acacia are given.

| Original acacia | Individual | Posterior probability for |                    |                    |
|-----------------|------------|---------------------------|--------------------|--------------------|
|                 |            | Original acacia           | Alternative acacia | Alternative acacia |
| 2a              | 2a-01      | 1.00                      |                    |                    |
| 2a              | 2a-02      | 1.00                      |                    |                    |
| 2a              | 2a-03      | 1.00                      |                    |                    |
| 2a              | 2a-04      | 1.00                      |                    |                    |
| 2a              | 2a-05      | 1.00                      |                    |                    |
| 2a              | 2a-06      | 1.00                      |                    |                    |
| 2a              | 2a-07      | 1.00                      |                    |                    |
| 2a              | 2a-08      | 1.00                      |                    |                    |
| 2a              | 2a-09      | 1.00                      |                    |                    |
| 2a              | 2a-10      | 1.00                      |                    |                    |
| 2b              | 2b-01      | 0.99                      |                    |                    |
| 2b              | 2b-02      | 0.91                      |                    |                    |
| 2b              | 2b-03      | 0.62                      |                    |                    |
| 2b              | 2b-04      | <b>0.46</b>               | <b>0.54</b>        | <b>2c</b>          |
| 2b              | 2b-05      | <b>0.21</b>               | <b>0.63</b>        | <b>2c</b>          |
| 2b              | 2b-06      | 0.92                      |                    |                    |
| 2b              | 2b-07      | 0.94                      |                    |                    |
| 2b              | 2b-08      | <b>0.46</b>               | <b>0.51</b>        | <b>2e</b>          |
| 2b              | 2b-09      | 0.86                      |                    |                    |
| 2c              | 2c-01      | 0.57                      |                    |                    |
| 2c              | 2c-02      | 0.56                      |                    |                    |
| 2c              | 2c-03      | <b>0.27</b>               | <b>0.50</b>        | <b>2b</b>          |
| 2c              | 2c-04      | 0.97                      |                    |                    |
| 2c              | 2c-05      | 0.98                      |                    |                    |
| 2c              | 2c-06      | 0.89                      |                    |                    |
| 2c              | 2c-07      | 0.98                      |                    |                    |
| 2c              | 2c-08      | 0.99                      |                    |                    |
| 2c              | 2c-09      | 0.96                      |                    |                    |
| 2c              | 2c-10      | 0.90                      |                    |                    |
| 2d              | 2d-01      | 0.97                      |                    |                    |
| 2d              | 2d-04      | 0.75                      |                    |                    |

|       |       |             |             |           |
|-------|-------|-------------|-------------|-----------|
| 2d    | 2d-05 | 0.93        |             |           |
| 2d    | 2d-06 | <b>0.10</b> | <b>0.57</b> | <b>2c</b> |
| 2d    | 2d-08 | 0.59        |             |           |
| 2d    | 2d-09 | 0.43        |             |           |
| <hr/> |       |             |             |           |
| 2e    | 2e-01 | 0.48        |             |           |
| 2e    | 2e-02 | <b>0.14</b> | <b>0.74</b> | <b>2f</b> |
| 2e    | 2e-03 | 0.99        |             |           |
| 2e    | 2e-04 | 1.00        |             |           |
| 2e    | 2e-05 | 0.99        |             |           |
| 2e    | 2e-06 | 0.98        |             |           |
| 2e    | 2e-07 | 0.53        |             |           |
| 2e    | 2e-08 | 0.99        |             |           |
| 2e    | 2e-09 | <b>0.22</b> | <b>0.61</b> | <b>2b</b> |
| 2e    | 2e-10 | 0.93        |             |           |
| <hr/> |       |             |             |           |
| 2f    | 2f-01 | 0.71        |             |           |
| 2f    | 2f-02 | 0.77        |             |           |
| 2f    | 2f-03 | 0.86        |             |           |
| 2f    | 2f-04 | 0.95        |             |           |
| 2f    | 2f-05 | 0.81        |             |           |
| 2f    | 2f-06 | 0.82        |             |           |
| 2f    | 2f-07 | 0.84        |             |           |
| 2f    | 2f-08 | 0.77        |             |           |
| 2f    | 2f-09 | 0.91        |             |           |
| 2f    | 2f-10 | 0.96        |             |           |
| <hr/> |       |             |             |           |
| 2g    | 2g-01 | 1.00        |             |           |
| 2g    | 2g-02 | 0.97        |             |           |
| 2g    | 2g-03 | 1.00        |             |           |
| 2g    | 2g-04 | 1.00        |             |           |
| 2g    | 2g-06 | <b>0.23</b> | <b>0.64</b> | <b>2d</b> |
| 2g    | 2g-07 | <b>0.33</b> | <b>0.39</b> | <b>2e</b> |
| 2g    | 2g-08 | <b>0.20</b> | <b>0.79</b> | <b>2d</b> |
| 2g    | 2g-09 | 0.48        |             |           |
| 2g    | 2g-10 | 0.72        |             |           |
| <hr/> |       |             |             |           |
| 2h    | 2h-01 | 0.89        |             |           |
| 2h    | 2h-02 | 0.95        |             |           |
| 2h    | 2h-03 | 0.89        |             |           |
| 2h    | 2h-04 | <b>0.48</b> | <b>0.51</b> | <b>2f</b> |
| 2h    | 2h-05 | 0.99        |             |           |
| <hr/> |       |             |             |           |

---

|    |       |      |
|----|-------|------|
| 2h | 2h-07 | 0.50 |
| 2h | 2h-08 | 0.85 |
| 2h | 2h-09 | 0.77 |
| 2h | 2h-10 | 0.94 |

---

III) Plot PARASITE1:Posterior probabilities of each individual worker to be assigned to its original acacia in which it was sampled based on the chemical hydrocarbon profile. Cases, in which posterior probabilities were higher for another acacia (bold), this posterior probability, as well as the identification for the other acacia are given.

| Original acacia | Individual | Posterior probability for |                    |                    |
|-----------------|------------|---------------------------|--------------------|--------------------|
|                 |            | Original acacia           | Alternative acacia | Alternative acacia |
| 1a              | 1a-01      | 1.00                      |                    |                    |
| 1a              | 1a-02      | 1.00                      |                    |                    |
| 1a              | 1a-03      | 1.00                      |                    |                    |
| 1a              | 1a-04      | 1.00                      |                    |                    |
| 1a              | 1a-05      | 1.00                      |                    |                    |
| 1a              | 1a-06      | 1.00                      |                    |                    |
| 1a              | 1a-07      | 1.00                      |                    |                    |
| 1a              | 1a-08      | 1.00                      |                    |                    |
| 1a              | 1a-09      | 1.00                      |                    |                    |
| 1a              | 1a-10      | 1.00                      |                    |                    |
| 1b              | 1b-01      | 0.97                      |                    |                    |
| 1b              | 1b-02      | 1.00                      |                    |                    |
| 1b              | 1b-03      | 0.96                      |                    |                    |
| 1b              | 1b-04      | 1.00                      |                    |                    |
| 1b              | 1b-05      | 1.00                      |                    |                    |
| 1b              | 1b-06      | 0.99                      |                    |                    |
| 1b              | 1b-07      | 0.98                      |                    |                    |
| 1b              | 1b-08      | 0.99                      |                    |                    |
| 1b              | 1b-09      | 1.00                      |                    |                    |
| 1b              | 1b-10      | 0.84                      |                    |                    |
| 1c              | 1c-01      | 1.00                      |                    |                    |
| 1c              | 1c-02      | 1.00                      |                    |                    |
| 1c              | 1c-03      | 1.00                      |                    |                    |
| 1c              | 1c-04      | 1.00                      |                    |                    |
| 1c              | 1c-05      | 0.65                      |                    |                    |
| 1c              | 1c-06      | 0.59                      |                    |                    |
| 1c              | 1c-07      | 1.00                      |                    |                    |
| 1c              | 1c-08      | 1.00                      |                    |                    |
| 1c              | 1c-09      | 1.00                      |                    |                    |
| 1c              | 1c-10      | 0.70                      |                    |                    |
| 1d              | 1d-01      | 1.00                      |                    |                    |

|       |       |             |             |           |
|-------|-------|-------------|-------------|-----------|
| 1d    | 1d-02 | 0.73        |             |           |
| 1d    | 1d-03 | <b>0.43</b> | <b>0.57</b> | <b>1e</b> |
| 1d    | 1d-04 | <b>0.48</b> | <b>0.52</b> | <b>1e</b> |
| 1d    | 1d-05 | 0.89        |             |           |
| 1d    | 1d-06 | 0.66        |             |           |
| 1d    | 1d-07 | 0.58        |             |           |
| 1d    | 1d-08 | <b>0.28</b> | <b>0.72</b> | <b>1e</b> |
| 1d    | 1d-09 | 0.51        |             |           |
| 1d    | 1d-10 | 0.18        | 0.82        | 1e        |
| <hr/> |       |             |             |           |
| 1e    | 1e-01 | 0.76        |             |           |
| 1e    | 1e-02 | <b>0.41</b> | <b>0.59</b> | <b>1d</b> |
| 1e    | 1e-03 | 0.55        |             |           |
| 1e    | 1e-04 | 0.78        |             |           |
| 1e    | 1e-05 | 0.61        |             |           |
| 1e    | 1e-06 | 0.81        |             |           |
| 1e    | 1e-07 | 0.79        |             |           |
| 1e    | 1e-08 | 0.81        |             |           |
| 1e    | 1e-09 | 0.65        |             |           |
| 1e    | 1e-10 | 0.68        |             |           |
| <hr/> |       |             |             |           |
| 1f    | 1f-01 | 1.00        |             |           |
| 1f    | 1f-02 | 0.78        |             |           |
| 1f    | 1f-03 | 0.98        |             |           |
| 1f    | 1f-04 | 0.99        |             |           |
| 1f    | 1f-05 | 0.77        |             |           |
| 1f    | 1f-06 | 0.97        |             |           |
| 1f    | 1f-07 | 0.81        |             |           |
| 1f    | 1f-08 | 0.97        |             |           |
| 1f    | 1f-09 | <b>0.25</b> | <b>0.52</b> | <b>1g</b> |
| 1f    | 1f-10 | 1.00        |             |           |
| <hr/> |       |             |             |           |
| 1g    | 1g-01 | 0.66        |             |           |
| 1g    | 1g-02 | 0.76        |             |           |
| 1g    | 1g-03 | 0.76        |             |           |
| 1g    | 1g-04 | 0.86        |             |           |
| 1g    | 1g-05 | 0.85        |             |           |
| 1g    | 1g-07 | 0.62        |             |           |
| 1g    | 1g-08 | <b>0.44</b> | <b>0.56</b> | <b>1h</b> |
| 1g    | 1g-09 | 0.67        |             |           |
| 1g    | 1g-10 | 0.80        |             |           |
| <hr/> |       |             |             |           |



---

|    |       |             |             |           |
|----|-------|-------------|-------------|-----------|
| 1h | 1h-01 | <b>0.42</b> | <b>0.57</b> | <b>1g</b> |
| 1h | 1h-02 | <b>0.45</b> | <b>0.54</b> | <b>1g</b> |
| 1h | 1h-03 | <b>0.28</b> | <b>0.72</b> | <b>1g</b> |
| 1h | 1h-04 | 1.00        |             |           |
| 1h | 1h-05 | 0.67        |             |           |
| 1h | 1h-07 | 0.86        |             |           |
| 1h | 1h-08 | 0.90        |             |           |
| 1h | 1h-09 | 0.78        |             |           |
| 1h | 1h-10 | 0.71        |             |           |

---

IV) Plot PARASITE2: Posterior probabilities of each individual worker to be assigned to its original acacia in which it was sampled based on the chemical hydrocarbon profile. Cases, in which posterior probabilities were higher for another acacia (bold), this posterior probability, as well as the identification for the other acacia are given.

| Original acacia | Individual | Posterior probability for |                    |                    |
|-----------------|------------|---------------------------|--------------------|--------------------|
|                 |            | Original acacia           | Alternative acacia | Alternative acacia |
| 2a              | 2a-01      | 0.50                      |                    |                    |
| 2a              | 2a-02      | <b>0.00</b>               | <b>0.88</b>        | <b>2b</b>          |
| 2a              | 2a-03      | 0.99                      |                    |                    |
| 2a              | 2a-04      | 1.00                      |                    |                    |
| 2a              | 2a-05      | 0.94                      |                    |                    |
| 2a              | 2a-06      | 0.96                      |                    |                    |
| 2a              | 2a-07      | 0.98                      |                    |                    |
| 2a              | 2a-08      | <b>0.03</b>               | <b>0.88</b>        | <b>2b</b>          |
| 2a              | 2a-09      | 1.00                      |                    |                    |
| 2a              | 2a-10      | 0.98                      |                    |                    |
| 2b              | 2b-03      | 0.94                      |                    |                    |
| 2b              | 2b-04      | 0.62                      |                    |                    |
| 2b              | 2b-05      | 0.99                      |                    |                    |
| 2b              | 2b-06      | 0.86                      |                    |                    |
| 2b              | 2b-07      | 0.98                      |                    |                    |
| 2b              | 2b-08      | 0.50                      |                    |                    |
| 2b              | 2b-09      | 1.00                      |                    |                    |
| 2b              | 2b-10      | 0.85                      |                    |                    |
| 2c              | 2c-01      | 1.00                      |                    |                    |
| 2c              | 2c-02      | 1.00                      |                    |                    |
| 2c              | 2c-03      | 1.00                      |                    |                    |
| 2c              | 2c-04      | 1.00                      |                    |                    |
| 2c              | 2c-05      | 1.00                      |                    |                    |
| 2c              | 2c-06      | 1.00                      |                    |                    |
| 2c              | 2c-07      | 1.00                      |                    |                    |
| 2c              | 2c-08      | 1.00                      |                    |                    |
| 2c              | 2c-09      | 1.00                      |                    |                    |
| 2c              | 2c-10      | 1.00                      |                    |                    |
| 2d              | 2d-01      | 1.00                      |                    |                    |
| 2d              | 2d-02      | 1.00                      |                    |                    |
| 2d              | 2d-03      | 1.00                      |                    |                    |

|    |       |             |             |           |
|----|-------|-------------|-------------|-----------|
| 2d | 2d-04 | 1.00        |             |           |
| 2d | 2d-05 | 1.00        |             |           |
| 2d | 2d-06 | 1.00        |             |           |
| 2d | 2d-07 | 1.00        |             |           |
| 2d | 2d-08 | 1.00        |             |           |
| 2d | 2d-09 | 1.00        |             |           |
| 2d | 2d-10 | 1.00        |             |           |
| 2e | 2e-01 | 0.80        |             |           |
| 2e | 2e-02 | 0.92        |             |           |
| 2e | 2e-03 | <b>0.38</b> | <b>0.60</b> | <b>2g</b> |
| 2e | 2e-04 | <b>0.08</b> | <b>0.87</b> | <b>2b</b> |
| 2e | 2e-05 | 0.96        |             |           |
| 2e | 2e-06 | 0.76        |             |           |
| 2e | 2e-07 | <b>0.37</b> | <b>0.61</b> | <b>2g</b> |
| 2e | 2e-08 | <b>0.08</b> | <b>0.91</b> | <b>2b</b> |
| 2e | 2e-09 | 0.96        |             |           |
| 2f | 2f-02 | 0.76        |             |           |
| 2f | 2f-03 | 0.69        |             |           |
| 2f | 2f-04 | <b>0.27</b> | <b>0.69</b> | <b>2g</b> |
| 2f | 2f-05 | 0.95        |             |           |
| 2f | 2f-06 | 0.62        |             |           |
| 2f | 2f-07 | 0.54        |             |           |
| 2f | 2f-08 | <b>0.12</b> | <b>0.83</b> | <b>2g</b> |
| 2f | 2f-10 | 0.90        |             |           |
| 2g | 2g-01 | 0.99        |             |           |
| 2g | 2g-02 | 0.67        |             |           |
| 2g | 2g-03 | 0.88        |             |           |
| 2g | 2g-04 | 0.96        |             |           |
| 2g | 2g-05 | 0.98        |             |           |
| 2g | 2g-06 | <b>0.29</b> | <b>0.71</b> | <b>2e</b> |
| 2g | 2g-07 | 0.95        |             |           |
| 2g | 2g-08 | <b>0.48</b> | <b>0.51</b> | <b>2e</b> |
| 2g | 2g-09 | 0.68        |             |           |
| 2g | 2g-10 | <b>0.18</b> | <b>0.73</b> | <b>2f</b> |
| 2h | 2h-01 | 0.84        |             |           |
| 2h | 2h-02 | 0.55        |             |           |
| 2h | 2h-03 | 0.62        |             |           |
| 2h | 2h-04 | <b>0.18</b> | <b>0.82</b> | <b>2a</b> |

---

|    |       |             |             |           |
|----|-------|-------------|-------------|-----------|
| 2h | 2h-05 | 0.90        |             |           |
| 2h | 2h-06 | 0.91        |             |           |
| 2h | 2h-07 | <b>0.35</b> | <b>0.62</b> | <b>2f</b> |
| 2h | 2h-08 | 0.98        |             |           |
| 2h | 2h-09 | 0.92        |             |           |

---
